# Supplementary material
Source: publisher figshare collection journal article supplement (https://acs.figshare.com/ndownloader/files/4574878)
Supplement: Supplementary file 1 [file 4574878]

data_global

_audit_creation_date               29-09-08


_publ_contact_author_name
;

','

;
_publ_contact_author_address
;
ICSN-CNRS
1 avenue de la Terrasse
91198 Gif sur Yvette
France

;
_publ_contact_author_phone         3316982
_publ_contact_author_fax           33169077247
_publ_contact_author_email         @icsn.cnrs-gif.fr

_publ_requested_journal            ?
_publ_requested_category           FM

_publ_section_title
; 

Routes to ................
..........................
..........................

;

loop_
_publ_author_name
_publ_author_address

'CHAUMONT, Manon'
;ICSN-CNRS
1 avenue de la Terrasse
91198 Gif sur Yvette
France
;

'RETAILLEAU, Pascal'
;ICSN-CNRS
1 avenue de la Terrasse
91198 Gif sur Yvette
France
;
'BAUDOIN, Olivier'
;ICSN-CNRS
1 avenue de la Terrasse
91198 Gif sur Yvette
France
;

_publ_section_abstract
; ?
;

_publ_section_comment
; ?
;

_publ_section_exptl_prep
; ?
;


_publ_section_exptl_refinement
; ?
;


_publ_section_references
;
Altomare, A., Burla, M. C., Camalli, M., Cascarano, G. L., Giacovazzo, C.,
Guagliardi, A., Moliterni, A. G. G., Polidori, G. & Spagna, R. (1999). <i>J.
Appl. Cryst.</i> <b>32</b>, 115-119.

Macrae, C. F., Edgington, P. R., McCabe, P., Pidcock, E., Shields, G. P.,
Taylor, R., Towler, M. & van de Streek, J. (2006). Mercury: visualization and
analysis of crystal structures. <i>J.Appl. Cryst.</i> <b>39</b>, 453-457.

Nonius, B. V. (1999). <i>COLLECT</i>, data collection software.

Otwinowski, Z. & Minor, W. (1997). Methods in Enzymology, Volume 276,
Macromolecular Crystallography, part A, edited by C.W. Carter, Jr. & R.M.
Sweet, 307-326, 1997, New York: Academic Press.

Sheldrick, G.M. (2008).<i>Acta Cryst.</i> A<b>64</b>, 112-122.

Spek, A. L. (2003). <i>J.Appl. Cryst.</i> <b>36</b>, 7-13.

Welter, R. (2006). The Crystalbuilder Project
<i>Acta Cryst.</i> A<b>62</b>, s252.


;

_publ_section_figure_captions
; ?
;

_publ_section_acknowledgements
; ?
;
 
data_mc808a 
 
_audit_creation_method            SHELXL-97 
_chemical_name_systematic 
; 
 methyl 2,4-dimethyl-1,3-dioxo-7-(trifluoromethyl)-2,3,3a,4,9,9a-
 hexahydro-1H-benzo[f]isoindole-4-carboxylate 
; 
_chemical_name_common             ? 
_chemical_melting_point           ? 
_chemical_formula_moiety          'C17 H16 F3 N O4' 
_chemical_formula_sum 
 'C17 H16 F3 N O4' 
_chemical_formula_weight          355.31 
_chemical_absolute_configuration  unk 
 
loop_ 
 _atom_type_symbol 
 _atom_type_description 
 _atom_type_scat_dispersion_real 
 _atom_type_scat_dispersion_imag 
 _atom_type_scat_source 
 'C'  'C'   0.0033   0.0016 
 'International Tables Vol C Tables 4.2.6.8 and 6.1.1.4' 
 'H'  'H'   0.0000   0.0000 
 'International Tables Vol C Tables 4.2.6.8 and 6.1.1.4' 
 'N'  'N'   0.0061   0.0033 
 'International Tables Vol C Tables 4.2.6.8 and 6.1.1.4' 
 'O'  'O'   0.0106   0.0060 
 'International Tables Vol C Tables 4.2.6.8 and 6.1.1.4' 
 'F'  'F'   0.0171   0.0103 
 'International Tables Vol C Tables 4.2.6.8 and 6.1.1.4' 
 
_symmetry_cell_setting            'orthorhombic' 
_symmetry_space_group_name_H-M    'Fdd2' 
_symmetry_space_group_name_Hall   'F 2 -2d' 
 
loop_ 
 _symmetry_equiv_pos_as_xyz 
 'x, y, z' 
 '-x, -y, z' 
 '-x+1/4, y+1/4, z+1/4' 
 'x+1/4, -y+1/4, z+1/4' 
 'x, y+1/2, z+1/2' 
 '-x, -y+1/2, z+1/2' 
 '-x+1/4, y+3/4, z+3/4' 
 'x+1/4, -y+3/4, z+3/4' 
 'x+1/2, y, z+1/2' 
 '-x+1/2, -y, z+1/2' 
 '-x+3/4, y+1/4, z+3/4' 
 'x+3/4, -y+1/4, z+3/4' 
 'x+1/2, y+1/2, z' 
 '-x+1/2, -y+1/2, z' 
 '-x+3/4, y+3/4, z+1/4' 
 'x+3/4, -y+3/4, z+1/4' 
 
_cell_length_a                    25.902(4) 
_cell_length_b                    28.819(4) 
_cell_length_c                    8.794(2) 
_cell_angle_alpha                 90.00 
_cell_angle_beta                  90.00 
_cell_angle_gamma                 90.00 
_cell_volume                      6564(2) 
_cell_formula_units_Z             16 
_cell_measurement_temperature     293(2) 
_cell_measurement_reflns_used     ? 
_cell_measurement_theta_min       ? 
_cell_measurement_theta_max       ? 
 
_exptl_crystal_description        prism 
_exptl_crystal_colour            'colourless'
_exptl_crystal_size_max           0.10 
_exptl_crystal_size_mid           0.10 
_exptl_crystal_size_min           0.10 
_exptl_crystal_density_meas       ? 
_exptl_crystal_density_diffrn     1.438 
_exptl_crystal_density_method     'not measured' 
_exptl_crystal_F_000              2944 
_exptl_absorpt_coefficient_mu     0.124 
_exptl_absorpt_correction_type    multi-scan 
_exptl_absorpt_correction_T_min   ? 
_exptl_absorpt_correction_T_max   ?
_exptl_absorpt_process_details    'Scalepack (Otwinowski & Minor, 1997)'
     
_exptl_special_details 
; 
 ? 
; 
 
_diffrn_ambient_temperature       293(2) 
_diffrn_radiation_wavelength      0.71070 
_diffrn_radiation_type            MoK\a 
_diffrn_source                    'fine-focus sealed tube'
_diffrn_source_type               'Nonius Kappa CCD'
_diffrn_radiation_monochromator   graphite
_diffrn_measurement_device_type   'Nonius kappa-CCD diffractometer'
_diffrn_measurement_method        'phi and omega scans'
_diffrn_detector_area_resol_mean  9 
_diffrn_standards_number          0 
_diffrn_standards_interval_count  . 
_diffrn_standards_interval_time   . 
_diffrn_standards_decay_%         ?  
_diffrn_reflns_number             3265 
_diffrn_reflns_av_R_equivalents   0.0176 
_diffrn_reflns_av_sigmaI/netI     0.0266 
_diffrn_reflns_limit_h_min        -31 
_diffrn_reflns_limit_h_max        32 
_diffrn_reflns_limit_k_min        -35 
_diffrn_reflns_limit_k_max        35 
_diffrn_reflns_limit_l_min        -10 
_diffrn_reflns_limit_l_max        10 
_diffrn_reflns_theta_min          2.11 
_diffrn_reflns_theta_max          26.37 
_reflns_number_total              1785 
_reflns_number_gt                 1473 
_reflns_threshold_expression      >2sigma(I) 
 
_computing_data_collection       
'DENZO (Otwinowski & Minor, 1997); COLLECT (Nonius B.V., 1999)'
_computing_cell_refinement       
'DENZO (Otwinowski & Minor, 1997); COLLECT (Nonius B.V., 1999)'
_computing_data_reduction        'SCALEPACK (Otwinowski & Minor, 1997)'
_computing_structure_solution    'SHELXS97 (Sheldrick, 2008)'
_computing_structure_refinement    
'SHELXL97 (Sheldrick, 2008); CRYSTALBUILDER (Welter, 2006)'
_computing_molecular_graphics    'PLATON (Spek, 2003)'
_computing_publication_material  'SHELXL97 (Sheldrick, 2008)' 

_refine_special_details 
; 
 Refinement of F^2^ against ALL reflections.  The weighted R-factor wR and 
 goodness of fit S are based on F^2^, conventional R-factors R are based 
 on F, with F set to zero for negative F^2^. The threshold expression of 
 F^2^ > 2sigma(F^2^) is used only for calculating R-factors(gt) etc. and is 
 not relevant to the choice of reflections for refinement.  R-factors based 
 on F^2^ are statistically about twice as large as those based on F, and R- 
 factors based on ALL data will be even larger. 
; 
 
_refine_ls_structure_factor_coef  Fsqd  
_refine_ls_matrix_type            full 
_refine_ls_weighting_scheme       calc  
_refine_ls_weighting_details 
 'calc w=1/[\s^2^(Fo^2^)+(0.0553P)^2^+2.6474P] where P=(Fo^2^+2Fc^2^)/3' 
_atom_sites_solution_primary      direct 
_atom_sites_solution_secondary    difmap 
_atom_sites_solution_hydrogens    difmap 
_refine_ls_hydrogen_treatment     constr
_refine_ls_extinction_method      SHELXL 
_refine_ls_extinction_coef        0.0020(3) 
_refine_ls_extinction_expression 
 'Fc^*^=kFc[1+0.001xFc^2^\l^3^/sin(2\q)]^-1/4^' 
_refine_ls_number_reflns          1785 
_refine_ls_number_parameters      230 
_refine_ls_number_restraints      1 
_refine_ls_R_factor_all           0.0511 
_refine_ls_R_factor_gt            0.0365 
_refine_ls_wR_factor_ref          0.0957 
_refine_ls_wR_factor_gt           0.0884 
_refine_ls_goodness_of_fit_ref    1.042 
_refine_ls_restrained_S_all       1.042 
_refine_ls_shift/su_max           0.003 
_refine_ls_shift/su_mean          0.000 
 
loop_ 
 _atom_site_label 
 _atom_site_type_symbol 
 _atom_site_fract_x 
 _atom_site_fract_y 
 _atom_site_fract_z 
 _atom_site_U_iso_or_equiv 
 _atom_site_adp_type 
 _atom_site_occupancy 
 _atom_site_symmetry_multiplicity 
 _atom_site_calc_flag 
 _atom_site_refinement_flags 
 _atom_site_disorder_assembly 
 _atom_site_disorder_group 
F1 F 0.55651(8) 0.11014(7) -0.0999(3) 0.0896(7) Uani 1 1 d . . . 
F2 F 0.57449(8) 0.04982(10) 0.0241(4) 0.1165(11) Uani 1 1 d . . . 
F3 F 0.54684(10) 0.04424(11) -0.2010(4) 0.1210(11) Uani 1 1 d . . . 
O1 O 0.28624(8) 0.01689(7) 0.3129(3) 0.0639(6) Uani 1 1 d . . . 
O2 O 0.31839(8) -0.00728(7) 0.0917(3) 0.0643(6) Uani 1 1 d . . . 
O3 O 0.33074(10) 0.17918(7) 0.1766(3) 0.0728(7) Uani 1 1 d . . . 
O4 O 0.43725(9) 0.13017(8) 0.5506(3) 0.0643(6) Uani 1 1 d . . . 
N1 N 0.38790(8) 0.16391(7) 0.3660(3) 0.0449(5) Uani 1 1 d . . . 
C1 C 0.42485(9) 0.05795(8) 0.1860(3) 0.0369(6) Uani 1 1 d . . . 
C2 C 0.47565(10) 0.05738(8) 0.1362(3) 0.0420(6) Uani 1 1 d . . . 
H2 H 0.5024 0.0515 0.2042 0.050 Uiso 1 1 calc R . . 
C3 C 0.48622(11) 0.06560(9) -0.0157(4) 0.0483(7) Uani 1 1 d . . . 
C4 C 0.44677(12) 0.07468(10) -0.1177(3) 0.0538(7) Uani 1 1 d . . . 
H4 H 0.4542 0.0798 -0.2198 0.065 Uiso 1 1 calc R . . 
C5 C 0.39640(11) 0.07607(10) -0.0675(3) 0.0490(7) Uani 1 1 d . . . 
H5 H 0.3699 0.0822 -0.1359 0.059 Uiso 1 1 calc R . . 
C6 C 0.38500(9) 0.06834(8) 0.0848(3) 0.0382(6) Uani 1 1 d . . . 
C7 C 0.54052(13) 0.06729(11) -0.0713(4) 0.0638(9) Uani 1 1 d . . . 
C8 C 0.33071(9) 0.07193(8) 0.1498(3) 0.0410(6) Uani 1 1 d . . . 
C9 C 0.30965(10) 0.02434(9) 0.1972(3) 0.0451(6) Uani 1 1 d . . . 
C10 C 0.29770(16) -0.05309(11) 0.1198(5) 0.0839(12) Uani 1 1 d . . . 
H10A H 0.3160 -0.0672 0.2026 0.126 Uiso 1 1 calc R . . 
H10B H 0.3016 -0.0718 0.0301 0.126 Uiso 1 1 calc R . . 
H10C H 0.2618 -0.0507 0.1452 0.126 Uiso 1 1 calc R . . 
C11 C 0.29070(10) 0.09114(11) 0.0358(4) 0.0568(8) Uani 1 1 d . . . 
H11A H 0.3031 0.1198 -0.0063 0.085 Uiso 1 1 calc R . . 
H11B H 0.2586 0.0966 0.0874 0.085 Uiso 1 1 calc R . . 
H11C H 0.2855 0.0690 -0.0444 0.085 Uiso 1 1 calc R . . 
C12 C 0.33362(9) 0.10173(8) 0.2952(3) 0.0425(6) Uani 1 1 d . . . 
H12 H 0.2996 0.1015 0.3437 0.051 Uiso 1 1 calc R . . 
C13 C 0.37359(11) 0.08482(8) 0.4120(3) 0.0423(6) Uani 1 1 d . . . 
H13 H 0.3558 0.0725 0.5017 0.051 Uiso 1 1 calc R . . 
C14 C 0.41123(10) 0.04790(9) 0.3493(3) 0.0418(6) Uani 1 1 d . . . 
H14A H 0.4424 0.0477 0.4103 0.050 Uiso 1 1 calc R . . 
H14B H 0.3954 0.0175 0.3563 0.050 Uiso 1 1 calc R . . 
C15 C 0.34909(10) 0.15215(10) 0.2670(3) 0.0470(6) Uani 1 1 d . . . 
C16 C 0.40375(11) 0.12768(9) 0.4556(3) 0.0439(6) Uani 1 1 d . . . 
C17 C 0.40794(12) 0.21098(10) 0.3823(4) 0.0588(8) Uani 1 1 d . . . 
H17A H 0.4250 0.2200 0.2901 0.088 Uiso 1 1 calc R . . 
H17B H 0.4320 0.2120 0.4651 0.088 Uiso 1 1 calc R . . 
H17C H 0.3799 0.2319 0.4023 0.088 Uiso 1 1 calc R . . 
 
loop_ 
 _atom_site_aniso_label 
 _atom_site_aniso_U_11 
 _atom_site_aniso_U_22 
 _atom_site_aniso_U_33 
 _atom_site_aniso_U_23 
 _atom_site_aniso_U_13 
 _atom_site_aniso_U_12 
F1 0.0781(13) 0.0668(12) 0.1239(19) 0.0150(13) 0.0431(14) -0.0156(9) 
F2 0.0516(12) 0.137(2) 0.161(3) 0.061(2) 0.0371(16) 0.0245(13) 
F3 0.0993(18) 0.126(2) 0.137(3) -0.0528(19) 0.0748(19) -0.0198(15) 
O1 0.0694(13) 0.0558(12) 0.0664(14) -0.0001(11) 0.0244(12) -0.0078(10) 
O2 0.0799(14) 0.0486(12) 0.0644(14) -0.0101(11) 0.0162(12) -0.0124(10) 
O3 0.0904(16) 0.0460(12) 0.0822(17) 0.0124(13) -0.0270(15) 0.0091(11) 
O4 0.0817(15) 0.0599(12) 0.0514(12) 0.0008(11) -0.0155(12) -0.0016(10) 
N1 0.0482(12) 0.0401(11) 0.0463(12) 0.0026(10) 0.0062(10) 0.0002(9) 
C1 0.0400(13) 0.0319(11) 0.0389(13) 0.0031(11) 0.0030(11) 0.0035(10) 
C2 0.0388(13) 0.0372(12) 0.0501(15) 0.0020(12) 0.0080(12) 0.0014(10) 
C3 0.0484(15) 0.0361(14) 0.0603(19) 0.0020(12) 0.0187(14) 0.0015(11) 
C4 0.0660(18) 0.0508(16) 0.0446(15) 0.0079(13) 0.0180(15) 0.0060(13) 
C5 0.0556(16) 0.0500(15) 0.0416(15) 0.0057(13) 0.0011(14) 0.0065(12) 
C6 0.0384(13) 0.0358(12) 0.0405(15) 0.0030(11) 0.0054(11) 0.0024(9) 
C7 0.0584(19) 0.0534(18) 0.080(2) 0.0072(18) 0.0334(19) -0.0002(14) 
C8 0.0379(13) 0.0407(13) 0.0443(14) 0.0016(12) 0.0011(12) 0.0044(10) 
C9 0.0392(13) 0.0447(14) 0.0512(17) -0.0045(13) 0.0021(13) 0.0029(11) 
C10 0.112(3) 0.0467(17) 0.093(3) -0.014(2) 0.017(3) -0.0230(17) 
C11 0.0452(15) 0.0604(18) 0.0647(19) 0.0024(15) -0.0072(15) 0.0073(13) 
C12 0.0390(13) 0.0388(13) 0.0497(16) 0.0015(12) 0.0103(12) 0.0052(10) 
C13 0.0526(14) 0.0380(13) 0.0361(13) 0.0024(11) 0.0108(12) 0.0032(11) 
C14 0.0472(14) 0.0404(13) 0.0377(14) 0.0048(11) 0.0040(11) 0.0061(11) 
C15 0.0477(14) 0.0412(14) 0.0520(16) 0.0018(13) 0.0059(13) 0.0071(12) 
C16 0.0513(15) 0.0434(14) 0.0370(13) 0.0011(12) 0.0075(13) 0.0055(11) 
C17 0.0614(18) 0.0451(15) 0.070(2) 0.0019(15) 0.0053(17) -0.0077(12) 
 
_geom_special_details 
; 
 All esds (except the esd in the dihedral angle between two l.s. planes) 
 are estimated using the full covariance matrix.  The cell esds are taken 
 into account individually in the estimation of esds in distances, angles 
 and torsion angles; correlations between esds in cell parameters are only 
 used when they are defined by crystal symmetry.  An approximate (isotropic) 
 treatment of cell esds is used for estimating esds involving l.s. planes. 
; 
 
loop_ 
 _geom_bond_atom_site_label_1 
 _geom_bond_atom_site_label_2 
 _geom_bond_distance 
 _geom_bond_site_symmetry_2 
 _geom_bond_publ_flag 
F1 C7 1.327(3) . ? 
F2 C7 1.315(5) . ? 
F3 C7 1.331(5) . ? 
O1 C9 1.204(4) . ? 
O2 C9 1.319(4) . ? 
O2 C10 1.446(4) . ? 
O3 C15 1.210(3) . ? 
O4 C16 1.207(3) . ? 
N1 C16 1.371(4) . ? 
N1 C15 1.372(4) . ? 
N1 C17 1.460(3) . ? 
C1 C2 1.387(4) . ? 
C1 C6 1.395(4) . ? 
C1 C14 1.506(4) . ? 
C2 C3 1.384(4) . ? 
C2 H2 0.9300 . ? 
C3 C4 1.385(4) . ? 
C3 C7 1.490(4) . ? 
C4 C5 1.378(4) . ? 
C4 H4 0.9300 . ? 
C5 C6 1.390(4) . ? 
C5 H5 0.9300 . ? 
C6 C8 1.521(3) . ? 
C8 C9 1.534(4) . ? 
C8 C12 1.542(4) . ? 
C8 C11 1.544(4) . ? 
C10 H10A 0.9600 . ? 
C10 H10B 0.9600 . ? 
C10 H10C 0.9600 . ? 
C11 H11A 0.9600 . ? 
C11 H11B 0.9600 . ? 
C11 H11C 0.9600 . ? 
C12 C15 1.528(4) . ? 
C12 C13 1.538(4) . ? 
C12 H12 0.9800 . ? 
C13 C16 1.511(4) . ? 
C13 C14 1.545(3) . ? 
C13 H13 0.9800 . ? 
C14 H14A 0.9700 . ? 
C14 H14B 0.9700 . ? 
C17 H17A 0.9600 . ? 
C17 H17B 0.9600 . ? 
C17 H17C 0.9600 . ? 
 
loop_ 
 _geom_angle_atom_site_label_1 
 _geom_angle_atom_site_label_2 
 _geom_angle_atom_site_label_3 
 _geom_angle 
 _geom_angle_site_symmetry_1 
 _geom_angle_site_symmetry_3 
 _geom_angle_publ_flag 
C9 O2 C10 116.5(3) . . ? 
C16 N1 C15 113.3(2) . . ? 
C16 N1 C17 123.0(2) . . ? 
C15 N1 C17 123.5(2) . . ? 
C2 C1 C6 120.2(2) . . ? 
C2 C1 C14 121.4(2) . . ? 
C6 C1 C14 118.4(2) . . ? 
C3 C2 C1 119.4(3) . . ? 
C3 C2 H2 120.3 . . ? 
C1 C2 H2 120.3 . . ? 
C2 C3 C4 120.8(3) . . ? 
C2 C3 C7 120.6(3) . . ? 
C4 C3 C7 118.6(3) . . ? 
C5 C4 C3 119.8(3) . . ? 
C5 C4 H4 120.1 . . ? 
C3 C4 H4 120.1 . . ? 
C4 C5 C6 120.4(3) . . ? 
C4 C5 H5 119.8 . . ? 
C6 C5 H5 119.8 . . ? 
C5 C6 C1 119.5(2) . . ? 
C5 C6 C8 123.2(2) . . ? 
C1 C6 C8 117.3(2) . . ? 
F2 C7 F1 105.6(3) . . ? 
F2 C7 F3 105.9(3) . . ? 
F1 C7 F3 105.3(3) . . ? 
F2 C7 C3 114.2(3) . . ? 
F1 C7 C3 112.8(2) . . ? 
F3 C7 C3 112.4(3) . . ? 
C6 C8 C9 111.7(2) . . ? 
C6 C8 C12 107.7(2) . . ? 
C9 C8 C12 106.9(2) . . ? 
C6 C8 C11 113.6(2) . . ? 
C9 C8 C11 105.0(2) . . ? 
C12 C8 C11 111.8(2) . . ? 
O1 C9 O2 123.9(3) . . ? 
O1 C9 C8 124.6(3) . . ? 
O2 C9 C8 111.4(2) . . ? 
O2 C10 H10A 109.5 . . ? 
O2 C10 H10B 109.5 . . ? 
H10A C10 H10B 109.5 . . ? 
O2 C10 H10C 109.5 . . ? 
H10A C10 H10C 109.5 . . ? 
H10B C10 H10C 109.5 . . ? 
C8 C11 H11A 109.5 . . ? 
C8 C11 H11B 109.5 . . ? 
H11A C11 H11B 109.5 . . ? 
C8 C11 H11C 109.5 . . ? 
H11A C11 H11C 109.5 . . ? 
H11B C11 H11C 109.5 . . ? 
C15 C12 C13 103.5(2) . . ? 
C15 C12 C8 114.1(2) . . ? 
C13 C12 C8 114.2(2) . . ? 
C15 C12 H12 108.3 . . ? 
C13 C12 H12 108.3 . . ? 
C8 C12 H12 108.3 . . ? 
C16 C13 C12 105.0(2) . . ? 
C16 C13 C14 109.1(2) . . ? 
C12 C13 C14 113.9(2) . . ? 
C16 C13 H13 109.6 . . ? 
C12 C13 H13 109.6 . . ? 
C14 C13 H13 109.6 . . ? 
C1 C14 C13 110.8(2) . . ? 
C1 C14 H14A 109.5 . . ? 
C13 C14 H14A 109.5 . . ? 
C1 C14 H14B 109.5 . . ? 
C13 C14 H14B 109.5 . . ? 
H14A C14 H14B 108.1 . . ? 
O3 C15 N1 123.1(3) . . ? 
O3 C15 C12 128.0(3) . . ? 
N1 C15 C12 108.9(2) . . ? 
O4 C16 N1 124.6(3) . . ? 
O4 C16 C13 126.6(2) . . ? 
N1 C16 C13 108.8(2) . . ? 
N1 C17 H17A 109.5 . . ? 
N1 C17 H17B 109.5 . . ? 
H17A C17 H17B 109.5 . . ? 
N1 C17 H17C 109.5 . . ? 
H17A C17 H17C 109.5 . . ? 
H17B C17 H17C 109.5 . . ? 
 
loop_ 
 _geom_torsion_atom_site_label_1 
 _geom_torsion_atom_site_label_2 
 _geom_torsion_atom_site_label_3 
 _geom_torsion_atom_site_label_4 
 _geom_torsion 
 _geom_torsion_site_symmetry_1 
 _geom_torsion_site_symmetry_2 
 _geom_torsion_site_symmetry_3 
 _geom_torsion_site_symmetry_4 
 _geom_torsion_publ_flag 
C6 C1 C2 C3 -2.2(4) . . . . ? 
C14 C1 C2 C3 178.3(2) . . . . ? 
C1 C2 C3 C4 0.5(4) . . . . ? 
C1 C2 C3 C7 177.3(2) . . . . ? 
C2 C3 C4 C5 0.7(4) . . . . ? 
C7 C3 C4 C5 -176.1(3) . . . . ? 
C3 C4 C5 C6 -0.1(4) . . . . ? 
C4 C5 C6 C1 -1.6(4) . . . . ? 
C4 C5 C6 C8 176.6(2) . . . . ? 
C2 C1 C6 C5 2.8(4) . . . . ? 
C14 C1 C6 C5 -177.7(2) . . . . ? 
C2 C1 C6 C8 -175.5(2) . . . . ? 
C14 C1 C6 C8 4.0(3) . . . . ? 
C2 C3 C7 F2 15.4(4) . . . . ? 
C4 C3 C7 F2 -167.7(3) . . . . ? 
C2 C3 C7 F1 -105.1(4) . . . . ? 
C4 C3 C7 F1 71.7(4) . . . . ? 
C2 C3 C7 F3 136.0(3) . . . . ? 
C4 C3 C7 F3 -47.1(4) . . . . ? 
C5 C6 C8 C9 111.0(3) . . . . ? 
C1 C6 C8 C9 -70.8(3) . . . . ? 
C5 C6 C8 C12 -132.0(3) . . . . ? 
C1 C6 C8 C12 46.3(3) . . . . ? 
C5 C6 C8 C11 -7.5(4) . . . . ? 
C1 C6 C8 C11 170.7(2) . . . . ? 
C10 O2 C9 O1 0.6(5) . . . . ? 
C10 O2 C9 C8 -176.6(3) . . . . ? 
C6 C8 C9 O1 137.2(3) . . . . ? 
C12 C8 C9 O1 19.6(3) . . . . ? 
C11 C8 C9 O1 -99.3(3) . . . . ? 
C6 C8 C9 O2 -45.6(3) . . . . ? 
C12 C8 C9 O2 -163.2(2) . . . . ? 
C11 C8 C9 O2 77.9(3) . . . . ? 
C6 C8 C12 C15 65.3(3) . . . . ? 
C9 C8 C12 C15 -174.5(2) . . . . ? 
C11 C8 C12 C15 -60.2(3) . . . . ? 
C6 C8 C12 C13 -53.4(3) . . . . ? 
C9 C8 C12 C13 66.7(3) . . . . ? 
C11 C8 C12 C13 -178.9(2) . . . . ? 
C15 C12 C13 C16 7.0(3) . . . . ? 
C8 C12 C13 C16 131.6(2) . . . . ? 
C15 C12 C13 C14 -112.3(2) . . . . ? 
C8 C12 C13 C14 12.3(3) . . . . ? 
C2 C1 C14 C13 132.1(2) . . . . ? 
C6 C1 C14 C13 -47.4(3) . . . . ? 
C16 C13 C14 C1 -80.0(3) . . . . ? 
C12 C13 C14 C1 36.8(3) . . . . ? 
C16 N1 C15 O3 -178.5(3) . . . . ? 
C17 N1 C15 O3 5.6(4) . . . . ? 
C16 N1 C15 C12 3.1(3) . . . . ? 
C17 N1 C15 C12 -172.8(2) . . . . ? 
C13 C12 C15 O3 175.3(3) . . . . ? 
C8 C12 C15 O3 50.6(4) . . . . ? 
C13 C12 C15 N1 -6.3(3) . . . . ? 
C8 C12 C15 N1 -131.0(2) . . . . ? 
C15 N1 C16 O4 -179.9(2) . . . . ? 
C17 N1 C16 O4 -4.0(4) . . . . ? 
C15 N1 C16 C13 1.7(3) . . . . ? 
C17 N1 C16 C13 177.6(2) . . . . ? 
C12 C13 C16 O4 176.0(3) . . . . ? 
C14 C13 C16 O4 -61.6(3) . . . . ? 
C12 C13 C16 N1 -5.6(3) . . . . ? 
C14 C13 C16 N1 116.7(2) . . . . ? 
 
_diffrn_measured_fraction_theta_max    0.996 
_diffrn_reflns_theta_full              26.37 
_diffrn_measured_fraction_theta_full   0.996 
_refine_diff_density_max    0.138 
_refine_diff_density_min   -0.138 
_refine_diff_density_rms    0.032 
